# Supplementary material for: Variability in HIV-1 Integrase Gene and 3′-Polypurine Tract Sequences in Cameroon Clinical Isolates, and Implications for Integrase Inhibitors Efficacy
Source: MDPI journal article supplement (doi:10.3390/ijms21051553), 2020-02-25
Supplement: s1 [file s1]

**Table S1.** Subjects' ID numbers and subtypes of database samples, and the corresponding manuscripts PMID numbers

| <b>SUBJECT ID</b> | <b>PMID</b> | <b>Subtype</b> |
|-------------------|-------------|----------------|
| EU693240          | 18851680    | CRF25_cpx      |
| EF087995          | 17725418    | CRF36_cpx      |
| EF087994          | 17725418    | CRF36_cpx      |
| EF116594          | 17678477    | CRF37_cpx      |
| DQ845388          | 17331036    | CRF13_cpx      |
| DQ845387          | 17331036    | CRF13_cpx      |
| DQ845386          | 17331036    | CRF13_cpx      |
| AY169816          | 14678605    | O              |
| AY169815          | 14678605    | O              |
| AY169813          | 14678605    | O              |
| AY169812          | 14678605    | O              |
| AY169811          | 14678605    | O              |
| AY169810          | 14678605    | O              |
| AY169809          | 14678605    | O              |
| AY169808          | 14678605    | O              |
| AY169807          | 14678605    | O              |
| AY169806          | 14678605    | O              |
| AY169804          | 14678605    | O              |
| AY169803          | 14678605    | O              |
| AY169802          | 14678605    | O              |
| AJ291718          | 11839159    | CRF11_cpx      |
| AY371170          | 15186527    | F2             |
| AY371169          | 15186527    | CRF25_cpx      |
| AY371168          | 15186527    | CRF22_01A1     |
| AY371167          | 15186527    | CRF22_01A1     |
| AY371166          | 15186527    | CRF18_cpx      |
| AY371165          | 15186527    | CRF22_01A1     |
| AY371164          | 15186527    | A1             |
| AY371163          | 15186527    | CRF22_01A1     |
| AY371162          | 15186527    | H              |
| AY371161          | 15186527    | H              |
| AY371160          | 15186527    | A1             |
| AY371159          | 15186527    | CRF22_01A1     |
| AY371158          | 15186527    | F2             |
| AY371157          | 15186527    | D              |
| AY371156          | 15186527    | D              |
| AY371155          | 15186527    | D              |

|          |             |           |
|----------|-------------|-----------|
| AY371154 | 15186527    | CRF13_cpx |
| AY371153 | 15186527    | CRF11_cpx |
| AY371151 | 15186527    | CRF11_cpx |
| AY371150 | 15186527    | CRF11_cpx |
| AY371149 | 15186527    | CRF11_cpx |
| AY371147 | 15186527    | CRF02_AG  |
| AY371146 | 15186527    | CRF02_AG  |
| AY371145 | 15186527    | CRF02_AG  |
| AY371143 | 15186527    | CRF02_AG  |
| AY371142 | 15186527    | CRF02_AG  |
| AY371141 | 15186527    | CRF02_AG  |
| AY371140 | 15186527    | CRF02_AG  |
| AY371139 | 15186527    | CRF02_AG  |
| AY371138 | 15186527    | CRF02_AG  |
| AY371137 | 15186527    | CRF02_AG  |
| AY371136 | 15186527    | CRF02_AG  |
| AY371134 | 15186527    | CRF02_AG  |
| AY371132 | 15186527    | CRF02_AG  |
| AY371131 | 15186527    | CRF02_AG  |
| AY371130 | 15186527    | CRF02_AG  |
| AY371129 | 15186527    | CRF02_AG  |
| AY371128 | 15186527    | CRF02_AG  |
| AY371127 | 15186527    | CRF02_AG  |
| AY371126 | 15186527    | CRF02_AG  |
| AY371125 | 15186527    | CRF02_AG  |
| AY371124 | 15186527    | CRF02_AG  |
| AY371123 | 15186527    | CRF02_AG  |
| AY371122 | 15186527    | CRF02_AG  |
| AY371121 | 15186527    | G         |
| DQ826727 | Unpublished | CRF25_cpx |
| DQ826726 | Unpublished | CRF25_cpx |
| DQ017383 | 16438650    | N         |
| DQ017382 | 16438650    | N         |
| AY772535 | 15929705    | G         |
| AJ271370 | 15199313    | N         |
| AJ249239 | 10659053    | K         |
| AJ249237 | 10659053    | F2        |
| AJ249236 | 10659053    | F2        |
| AJ239083 | 10438826    | CRF02_AG  |
| AJ006022 | 9734396     | N         |
| AY623602 | 15321704    | O         |

|          |             |                            |
|----------|-------------|----------------------------|
| AY618998 | 15321704    | O                          |
| AY532635 | 15320995    | N                          |
| AY271690 | 12954230    | CRF02_AG                   |
| AF492624 | 12201907    | CRF11_cpx                  |
| AF492623 | 12201907    | CRF11_cpx                  |
| AF460974 | 12201907    | CRF13_cpx                  |
| AF460972 | 12201907    | CRF13_cpx                  |
| AF377955 | 11448170    | CRF02_AG                   |
| AF377954 | 11448170    | CRF02_AG                   |
| L20571   | 8107219     | O                          |
| FJ389367 | 19361281    | G                          |
| FJ389366 | 19361281    | G                          |
| FJ389365 | 19361281    | G                          |
| FJ389364 | 19361281    | G                          |
| FJ389363 | 19361281    | G                          |
| GQ229529 | 20812894    | CRF22_01A1                 |
| AB485667 | Unpublished | O                          |
| AB485666 | Unpublished | O                          |
| EU743964 | Unpublished | A1                         |
| EU743963 | 20812894    | A1                         |
| FN392876 | 20001521    | CRF45_cpx                  |
| GU201516 | 20426823    | A2                         |
| GU201514 | 20426823    | CRF02_AG                   |
| GU201513 | 20426823    | CRF02_AG                   |
| GU201512 | 20426823    | CRF02_AG                   |
| GU201511 | 20426823    | CRF02_AG                   |
| GU201508 | 20426823    | A1                         |
| GU201505 | 20426823    | F2/CRF01_AE<br>recombinant |
| GU201504 | 20426823    | CRF02_AG                   |
| GU201500 | 20426823    | CRF02_AG                   |
| GU201499 | 20426823    | CRF02_AG                   |
| GU201498 | 20426823    | CRF02_AG                   |
| GU201497 | 20426823    | CRF02_AG                   |
| GU201495 | 20426823    | CRF02_AG                   |
| GU201494 | 20426823    | CRF02_AG                   |
| GQ324962 | 20059396    | N                          |
| GQ324959 | 20059396    | N                          |
| GQ324958 | 20059396    | N                          |
| GU237072 | 20518650    | J                          |
| HQ179987 | 21084486    | P                          |
| JN864059 | 22549382    | A1                         |

|          |             |            |
|----------|-------------|------------|
| JN864057 | 22549382    | CRF02_AG   |
| JN864055 | 22549382    | CRF02_AG   |
| JN864053 | 22549382    | CRF02_AG   |
| JN864051 | 22549382    | CRF22_01A1 |
| JN864049 | 22549382    | CRF22_01A1 |
| JN864047 | 22549382    | A1         |
| JN864058 | 22549382    | A1         |
| JN864056 | 22549382    | G          |
| JN864052 | 22549382    | CRF02_AG   |
| JN864050 | 22549382    | A1         |
| JN864048 | 22549382    | A1         |
| JX140673 | Unpublished | F2         |
| JX140647 | Unpublished | CRF02_AG   |
| JX140676 | Unpublished | G          |
| JX140672 | Unpublished | F2         |
| JX140670 | Unpublished | D          |
| JX140646 | Unpublished | CRF02_AG   |
| KF716465 | Unpublished | CRF22_01A1 |
| KF716464 | Unpublished | CRF02_AG   |
| KF716463 | Unpublished | CRF22_01A1 |
| KF716462 | Unpublished | CRF22_01A1 |
| KF716461 | Unpublished | CRF22_01A1 |
| KF716460 | Unpublished | CRF22_01A1 |
| KF859740 | Unpublished | CRF02_AG   |
| KF859739 | Unpublished | CRF02_AG   |
| KP109503 | Unpublished | CRF11_cpx  |
| KP109502 | Unpublished | G          |
| KP109501 | Unpublished | D          |
| KP109500 | Unpublished | CRF22_01A1 |
| KP109499 | Unpublished | CRF22_01A1 |
| KP109498 | Unpublished | CRF22_01A1 |
| KR822830 | Unpublished | CRF11_cpx  |
| KP718938 | Unpublished | CRF11_cpx  |
| KP718937 | Unpublished | CRF11_cpx  |
| KP718936 | Unpublished | CRF11_cpx  |
| KP718935 | Unpublished | CRF11_cpx  |
| KP718934 | Unpublished | CRF11_cpx  |
| KP718933 | Unpublished | URF        |
| KP718932 | Unpublished | URF        |
| KP718931 | Unpublished | CRF18_cpx  |
| KP718930 | Unpublished | CRF01_AE   |

|          |             |           |
|----------|-------------|-----------|
| KP718929 | Unpublished | CRF11_cpx |
| KP718928 | Unpublished | A1        |
| KP718927 | Unpublished | URF       |
| KP718926 | Unpublished | CRF13_cpx |
| KP718925 | Unpublished | G         |
| KP718924 | Unpublished | CRF13_cpx |
| KP718923 | Unpublished | G         |
| KP718922 | Unpublished | CRF02_AG  |
| KP718921 | Unpublished | URF       |
| KP718920 | Unpublished | CRF11_cpx |
| KP718919 | Unpublished | CRF45_cpx |
| KP718918 | Unpublished | A1        |
| KP718917 | Unpublished | CRF37_cpx |
| KP718916 | Unpublished | D         |
| KP718915 | Unpublished | G         |
| KP718914 | Unpublished | CRF11_cpx |
| KR017779 | 26354000    | F2        |
| KR017778 | 26354000    | CRF11_cpx |
| KR017777 | 26354000    | CRF02_AG  |
| KR017776 | 26354000    | G         |
| KR017774 | 26354000    | CRF36_cpx |
| KR017773 | 26354000    | CRF02_AG  |
| KR017772 | 26354000    | URF       |
| KR017771 | 26354000    | CRF02_AG  |
| KU168295 | 26699702    | O         |
| KU168294 | 26699702    | O         |
| KU168293 | 26699702    | O         |
| KU168285 | 26699702    | O         |
| KU168281 | 26699702    | O         |
| KU168265 | 26699702    | CRF02_AG  |
| KU168311 | 26699702    | A1        |
| KU168310 | 26699702    | CRF02_AG  |
| KU168307 | 26699702    | CRF02_AG  |
| KU168306 | 26699702    | G         |
| KU168305 | 26699702    | A1        |
| KU168304 | 26699702    | CRF02_AG  |
| KU168303 | 26699702    | CRF02_AG  |
| KU168302 | 26699702    | G         |
| KX228824 | Unpublished | CRF02_AG  |
| KX228823 | Unpublished | CRF02_AG  |

|          |             |                 |
|----------|-------------|-----------------|
| KX228819 | Unpublished | A1              |
| KX228817 | Unpublished | CRF22_01A1      |
| KX228816 | Unpublished | CRF22_01A1      |
| KX228809 | Unpublished | F2              |
| KX398187 | Unpublished | CRF02_AG        |
| KX579838 | Unpublished | O               |
| KU749422 | Unpublished | F2              |
| KU749421 | Unpublished | CRF02_AG        |
| KU749420 | Unpublished | F2              |
| KU749419 | Unpublished | CRF02_AG        |
| KY498771 | 28193549    | N               |
| KY658700 | Unpublished | CRF11_cpx       |
| KM438032 | Unpublished | M/O Recombinant |
| KM438031 | Unpublished | M/O Recombinant |
| MF767262 | 29575910    | N               |

PMID: Unique identifier number used in PubMed
